# Supplementary material for: Preparing Polypyrrole-Coated Stretchable Textile via Low-Temperature Interfacial Polymerization for Highly Sensitive Strain Sensor
Source: PubMed Central journal article supplement (PMC6915628; doi:10.3390/mi10110788), 2019-11-17
Supplement: micromachines-10-00788-s001.pdf [file micromachines-10-00788-s001.pdf]

## Supplementary Materials

# Preparing Polypyrrole-Coated Stretchable Textile via Low-Temperature Interfacial Polymerization for Highly Sensitive Strain Sensor

Xiaodie Chen, Bintian Li, Yan Qiao and Zhisong Lu

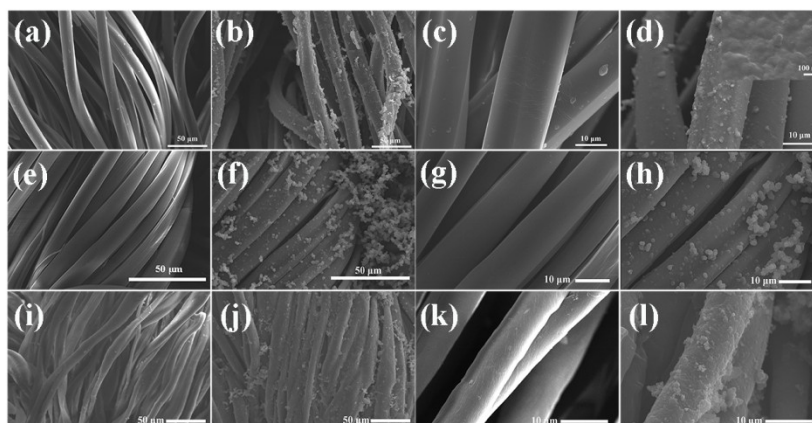

**Figure S1.** SEM images of pristine nylon/lycra, silk and cotton fabrics at low (a,e,i) and high magnifications (c,g,k); SEM images of PPy-coated nylon/lycra, silk and cotton fabrics at low (b,f,j) and high magnifications (d,h,l).

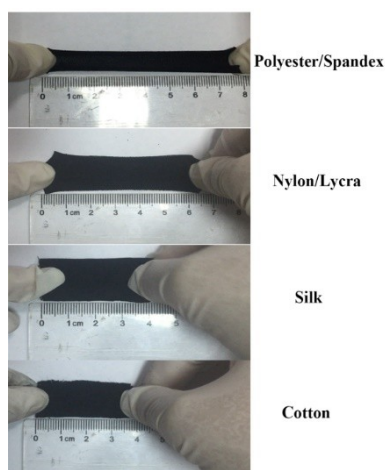

**Figure S2.** PPy-coated polyester/spandex, nylon/lycra, silk and cotton textiles stretched to the maximum strain.

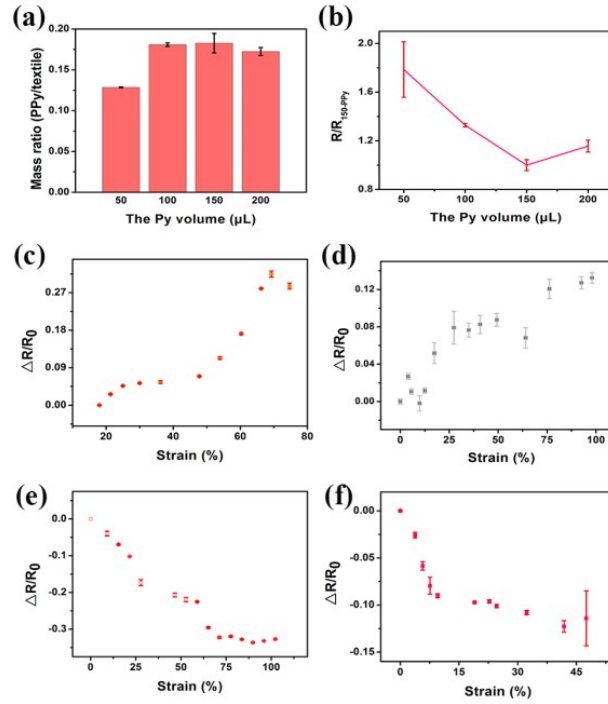

**Figure S3.** Mass ratios (a) of surface-coated PPy to the textile and resistance ratios (b) of the as-prepared conducting textiles after polymerization with different volume of Py. Relative resistance change ( $\Delta R/R_0$ ) of the as-prepared textiles prepared with 50  $\mu\text{L}$  Py (c), 100  $\mu\text{L}$  Py (d), 150  $\mu\text{L}$  Py (e) and 200  $\mu\text{L}$  Py (f).

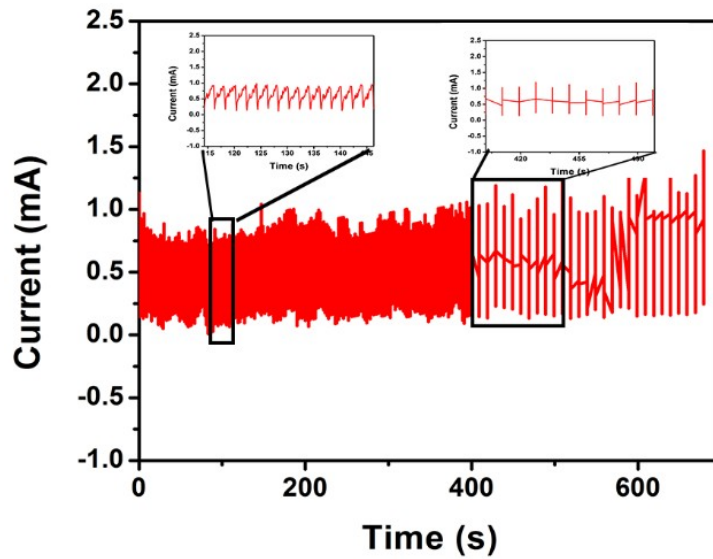

**Figure S4.** Current responses of a textile-based sensor upon periodic stretching-releasing cycles under a strain of 26%
